# Supplementary material
Source: Springer Nature journal article supplement (https://www.springermedizin.de/resource/supplementary/13229_2012_67_MOESM4_ESM.pdf/9676090)
Supplement: MOESM4 [file 9676090]

Additional Table 4. Significant absorbance data of PM-M4 wells for 20 controls (C1-C20) and 20 patients with ASDs (A1-A20).

| Substrate | C1   | C2   | C3   | C4   | C5   | C6   | C7   | C8   | C9   | C10  | C11  | C12  | C13  | C14  | C15  | C16  | C17  | C18  | C19  | C20  | A1   | A2   | A3   | A4   | A5   | A6   | A7   | A8   | A9   | A10  | A11  | A12  | A13  | A14  | A15  | A16  | A17  | A18  | A19  | A20  | P value |
|-----------|------|------|------|------|------|------|------|------|------|------|------|------|------|------|------|------|------|------|------|------|------|------|------|------|------|------|------|------|------|------|------|------|------|------|------|------|------|------|------|------|---------|
| Phe-Met   | 0.14 | 0.16 | 0.11 | 0.14 | 0.13 | 0.15 | 0.15 | 0.18 | 0.15 | 0.15 | 0.14 | 0.17 | 0.13 | 0.12 | 0.16 | 0.13 | 0.13 | 0.19 | 0.20 | 0.18 | 0.20 | 0.18 | 0.34 | 0.18 | 0.23 | 0.25 | 0.15 | 0.14 | 0.10 | 0.18 | 0.42 | 0.16 | 0.28 | 0.13 | 0.14 | 0.17 | 0.18 | 0.20 | 0.17 | 0.19 | 0.0103  |
| Trp-Asp   | 0.62 | 0.69 | 0.35 | 0.40 | 0.67 | 0.66 | 0.65 | 0.55 | 0.91 | 1.23 | 1.05 | 0.62 | 0.28 | 0.55 | 0.37 | 0.58 | 0.52 | 0.65 | 0.78 | 0.89 | 0.65 | 0.47 | 0.53 | 0.44 | 0.28 | 0.70 | 0.38 | 0.46 | 0.69 | 0.58 | 0.45 | 0.53 | 0.52 | 0.17 | 0.44 | 0.44 | 0.61 | 0.67 | 0.38 | 0.35 | 0.0122  |
| Trp-Ala   | 0.65 | 0.62 | 0.40 | 0.45 | 0.68 | 0.80 | 0.63 | 0.64 | 1.01 | 1.45 | 1.21 | 0.73 | 0.35 | 0.63 | 0.47 | 0.62 | 0.59 | 0.71 | 0.88 | 1.00 | 0.82 | 0.57 | 0.57 | 0.50 | 0.34 | 0.83 | 0.45 | 0.60 | 0.72 | 0.59 | 0.39 | 0.60 | 0.55 | 0.23 | 0.64 | 0.47 | 0.58 | 0.52 | 0.46 | 0.44 | 0.0137  |
| Trp-Trp   | 0.76 | 0.77 | 0.39 | 0.43 | 0.62 | 0.88 | 0.76 | 0.72 | 1.07 | 1.52 | 1.19 | 0.75 | 0.34 | 0.67 | 0.52 | 0.73 | 0.66 | 0.84 | 0.89 | 1.20 | 0.95 | 0.57 | 0.61 | 0.51 | 0.36 | 0.86 | 0.37 | 0.63 | 0.74 | 0.64 | 0.44 | 0.66 | 0.55 | 0.25 | 0.69 | 0.49 | 0.77 | 0.81 | 0.46 | 0.40 | 0.0144  |
| Trp-Ser   | 0.59 | 0.60 | 0.31 | 0.34 | 0.57 | 0.69 | 0.58 | 0.58 | 0.83 | 1.12 | 1.04 | 0.61 | 0.33 | 0.51 | 0.44 | 0.56 | 0.52 | 0.63 | 0.75 | 0.82 | 0.69 | 0.44 | 0.46 | 0.42 | 0.28 | 0.68 | 0.40 | 0.48 | 0.59 | 0.51 | 0.42 | 0.49 | 0.48 | 0.21 | 0.56 | 0.42 | 0.65 | 0.67 | 0.40 | 0.37 | 0.0163  |
| Trp-Arg   | 0.54 | 0.54 | 0.31 | 0.22 | 0.61 | 0.61 | 0.54 | 0.47 | 0.71 | 1.05 | 0.88 | 0.49 | 0.27 | 0.43 | 0.33 | 0.47 | 0.46 | 0.66 | 0.73 | 0.72 | 0.59 | 0.40 | 0.46 | 0.38 | 0.25 | 0.57 | 0.30 | 0.43 | 0.56 | 0.41 | 0.40 | 0.50 | 0.46 | 0.17 | 0.43 | 0.38 | 0.52 | 0.57 | 0.33 | 0.31 | 0.0164  |
| Trp-Tyr   | 0.59 | 0.61 | 0.31 | 0.38 | 0.55 | 0.66 | 0.59 | 0.51 | 0.81 | 1.09 | 0.93 | 0.60 | 0.29 | 0.51 | 0.40 | 0.54 | 0.61 | 0.60 | 0.74 | 0.82 | 0.59 | 0.46 | 0.48 | 0.48 | 0.30 | 0.66 | 0.37 | 0.49 | 0.54 | 0.47 | 0.40 | 0.48 | 0.51 | 0.22 | 0.51 | 0.44 | 0.65 | 0.68 | 0.41 | 0.39 | 0.0177  |
| Trp-Gly   | 0.58 | 0.63 | 0.38 | 0.36 | 0.61 | 0.71 | 0.64 | 0.58 | 0.87 | 1.22 | 1.14 | 0.67 | 0.32 | 0.60 | 0.42 | 0.58 | 0.56 | 0.67 | 0.83 | 0.85 | 0.71 | 0.52 | 0.52 | 0.43 | 0.29 | 0.81 | 0.38 | 0.51 | 0.67 | 0.51 | 0.43 | 0.52 | 0.53 | 0.18 | 0.51 | 0.46 | 0.65 | 0.70 | 0.39 | 0.41 | 0.0179  |
| Trp-Val   | 0.65 | 0.63 | 0.35 | 0.38 | 0.60 | 0.64 | 0.63 | 0.57 | 0.84 | 1.21 | 1.01 | 0.58 | 0.32 | 0.52 | 0.39 | 0.55 | 0.62 | 0.66 | 0.81 | 0.88 | 0.72 | 0.48 | 0.52 | 0.44 | 0.34 | 0.70 | 0.38 | 0.51 | 0.58 | 0.51 | 0.49 | 0.52 | 0.52 | 0.20 | 0.53 | 0.44 | 0.70 | 0.69 | 0.38 | 0.36 | 0.0211  |
| Trp-Glu   | 0.59 | 0.59 | 0.33 | 0.41 | 0.70 | 0.62 | 0.64 | 0.52 | 0.81 | 1.10 | 0.98 | 0.55 | 0.29 | 0.54 | 0.38 | 0.55 | 0.49 | 0.63 | 0.69 | 0.87 | 0.63 | 0.49 | 0.51 | 0.40 | 0.28 | 0.74 | 0.35 | 0.48 | 0.61 | 0.51 | 0.49 | 0.50 | 0.53 | 0.18 | 0.50 | 0.40 | 0.65 | 0.64 | 0.36 | 0.34 | 0.0222  |
| Trp-Leu   | 0.55 | 0.68 | 0.40 | 0.38 | 0.58 | 0.79 | 0.62 | 0.58 | 0.80 | 1.13 | 1.05 | 0.63 | 0.34 | 0.56 | 0.48 | 0.61 | 0.55 | 0.83 | 0.74 | 0.86 | 0.71 | 0.49 | 0.54 | 0.51 | 0.35 | 0.74 | 0.44 | 0.47 | 0.67 | 0.54 | 0.43 | 0.61 | 0.53 | 0.11 | 0.45 | 0.63 | 0.61 | 0.69 | 0.56 | 0.44 | 0.0225  |
| Trp-Lys   | 0.68 | 0.58 | 0.32 | 0.33 | 0.53 | 0.66 | 0.67 | 0.55 | 0.87 | 1.14 | 1.03 | 0.55 | 0.29 | 0.50 | 0.37 | 0.51 | 0.50 | 0.64 | 0.72 | 0.82 | 0.67 | 0.47 | 0.45 | 0.40 | 0.31 | 0.65 | 0.38 | 0.49 | 0.60 | 0.55 | 0.42 | 0.47 | 0.49 | 0.19 | 0.52 | 0.42 | 0.63 | 0.65 | 0.41 | 0.35 | 0.0260  |
| Trp-Phe   | 0.68 | 0.55 | 0.38 | 0.35 | 0.54 | 0.70 | 0.63 | 0.48 | 0.71 | 0.93 | 0.85 | 0.58 | 0.37 | 0.49 | 0.44 | 0.55 | 0.50 | 0.62 | 0.69 | 0.72 | 0.65 | 0.40 | 0.51 | 0.48 | 0.33 | 0.57 | 0.41 | 0.58 | 0.60 | 0.54 | 0.46 | 0.60 | 0.52 | 0.22 | 0.45 | 0.49 | 0.57 | 0.63 | 0.46 | 0.41 | 0.0281  |
| Phe-Phe   | 0.16 | 0.14 | 0.11 | 0.12 | 0.13 | 0.16 | 0.13 | 0.15 | 0.14 | 0.17 | 0.16 | 0.16 | 0.13 | 0.14 | 0.18 | 0.14 | 0.15 | 0.19 | 0.24 | 0.19 | 0.22 | 0.16 | 0.28 | 0.17 | 0.18 | 0.17 | 0.16 | 0.15 | 0.13 | 0.16 | 0.33 | 0.16 | 0.22 | 0.12 | 0.12 | 0.16 | 0.20 | 0.20 | 0.20 | 0.19 | 0.0337  |
| Phe-Val   | 0.23 | 0.14 | 0.11 | 0.13 | 0.14 | 0.17 | 0.14 | 0.17 | 0.15 | 0.19 | 0.17 | 0.16 | 0.17 | 0.13 | 0.13 | 0.15 | 0.17 | 0.17 | 0.21 | 0.18 | 0.26 | 0.19 | 0.37 | 0.20 | 0.20 | 0.15 | 0.15 | 0.15 | 0.15 | 0.14 | 0.43 | 0.14 | 0.27 | 0.10 | 0.11 | 0.16 | 0.21 | 0.23 | 0.18 | 0.19 | 0.0514  |
